# Supplementary material
Source: HighWire-hosted journal article supplement (https://bmjopen.bmj.com/content/9/3/e022826)
Supplement: inline-supplementary-material-1 [file inline-supplementary-material-1.pdf]

## **1.-ICFEr – RITU2 “Ensayo clínico fase II para evaluar la seguridad del anticuerpo monoclonal humanizado anti-CD20 en pacientes con insuficiencia cardiaca con fracción de expulsión reducida”**

2a. *El protocolo se ha registrado en [clinicaltrials.gov](https://clinicaltrials.gov) (identificador: NCT03332888). Noviembre 2, 2017.*

3. *Septiembre 2018, versión 1.2*

### **4. Fuentes y tipo de apoyo financiero y de otro tipo**

Este ensayo clínico es iniciativa del investigador principal, el cual proporcionará los fondos para la realización del mismo. De la misma forma, se hará uso del material y la infraestructura del Hospital Zambrano Hellion.

### **5a. Nombres, afiliaciones y funciones de los colaboradores del protocolo**

Dr. Sánchez-Trujillo L, sub-investigador. Centro de Investigación Biomédica del Hospital Zambrano Hellion, TecSalud, Escuela de Medicina y Ciencias de la Salud, Tecnológico de Monterrey, México; Instituto de Cardiología y Medicina Vascular, TecSalud, Escuela de Medicina y Ciencias de la Salud, Tecnológico de Monterrey, México.

Dr. Jerjes-Sánchez C, sub-investigador. Instituto de Cardiología y Medicina Vascular, TecSalud, Escuela de Medicina y Ciencias de la Salud, Tecnológico de Monterrey, México; Centro de Investigación Biomédica del Hospital Zambrano Hellion, TecSalud, Escuela de Medicina, Tecnológico de Monterrey, México.

Dr. Garcia-Rivas G, sub-investigador. Centro de Investigación Biomédica del Hospital Zambrano Hellion, TecSalud, Escuela de Medicina y Ciencias de la Salud, Tecnológico de Monterrey, México.

Dr. Torre-Amione G, investigador principal. Instituto de Cardiología y Medicina Vascular, TecSalud, Escuela de Medicina y Ciencias de la Salud, Tecnológico de Monterrey, México; Centro de Investigación Biomédica del Hospital Zambrano Hellion, TecSalud, Escuela de Medicina, Tecnológico de Monterrey, México; Methodist DeBakey Heart and Vascular Center, The Methodist Hospital, EUA.

- Investigador principal: Deberá realizar una investigación objetiva y con resultados sustentables. Es responsable del diseño del estudio, dirigir e inspeccionar los aspectos financieros y coordinación del proyecto. Además, debe asegurar que la investigación se realice conforme a las regulaciones de COFEPRIS, políticas institucionales y buenas prácticas clínicas. Será responsable de identificar, preseleccionar, detectar e identificar pacientes para el estudio. También realizará o supervisará a través de un sub investigador el proceso para obtener el consentimiento informado (FCI). también supervisará las actividades del estudio y será responsable de la seguridad e integridad de los pacientes. Estará a cargo del expediente médico y se encargará de garantizar la privacidad de los pacientes. Elaborará informes técnicos sobre el progreso y cumplimiento del protocolo y presentará los documentos de fin del estudio en forma oportuna a las agencias federales correspondientes.
- Los sub-investigadores es responsable de la conducción del estudio durante la fase de preselección, selección y aplicación del medicamento del estudio. Estará a cargo de los expedientes médicos manteniendo la confidencialidad del paciente. Supervisará que los procedimientos se lleven a cabo correctamente y de la veracidad de los resultados.
- Las enfermeras del estudio serán las encargadas de tomar, peso y estatura, signos vitales, ECG, aplicar Holter de 48 horas, muestras de laboratorio, aplicación del HMA-CD20, y de vigilar la aparición de efectos secundarios. Contarán con certificación de ACLS, y tendrán las herramientas necesarias para identificar e iniciar la resolución de posibles complicaciones.

- El personal clínico consiste en una enfermera especializada en aplicación de quimioterapia, sub investigadores (cardiólogos) y residentes de cardiología.

#### **5b. Nombre e información de contacto del patrocinador del ensayo**

Dr. Guillermo Torre-Amione. Instituto de Cardiología y Medicina Vascul ar, TecSalud, Escuela de Medicina y Ciencias de la Salud, Tecnológico de Monterrey, México. Teléfono +52818888-0000. correo electrónico: [gtorre@tecsalud.mx](mailto:gtorre@tecsalud.mx)

**5c.** El diseño de este estudio fue realizado siguiendo los lineamientos de las guías SPIRIT, por los Drs. Sánchez-Trujillo L, Jerjes-Sánchez C., Rodríguez D, Pannefle k J, Ortiz-Ledesma C, García-Rivas G y Torre -Amione G. El Dr. Sánchez-Trujillo L se encargará de la recolección y el manejo de datos asegurando la confidencialidad. Todo el equipo realizará el análisis y la interpretación de los datos obtenidos. El Dr. Torre-Amione G, como investigador principal y patrocinador del ensayo, tendrá la autoridad para tomar la decisión final sobre cualquier actividad relacionada con el estudio .

#### **6a. Antecedentes y Justificación**

##### **Antecedentes**

Actualmente, a nivel mundial los síndromes de insuficiencia cardiaca tienen una incidencia de aproximadamente 26 millones de personas, con alta tasa de mortalidad a cinco años en la mitad de la población<sup>1</sup>. En los Estados Unidos, entre los años 2009 y 2012, la prevalencia fue de 5.7 millones de personas; del 2011 al 2014 se observó un incremento de 6.5 millones, y para el año 2030 se espera un incremento del 46%, es decir, casi 8 millones de Norteamericanos se verán afectados<sup>1,2</sup>. Además, en adultos los síndromes de insuficiencia cardiaca son la cuarta causa de hospitalización y en mayores de 65 años, son la causa más frecuente de hospitalización<sup>2,3</sup>. En pacientes con síndromes de insuficiencia cardiaca en clase funcional III y IV de la NYHA, la mortalidad a un año, es superior al 30% y en aquellos en clase IV es superior al 60%<sup>3</sup>. Los principales mecanismos de mortalidad son arritmias ventriculares, infarto recurrente, alteraciones electrolíticas y uso de fármacos psicotr ópicos y antiarrítmicos. La fibrilación auricular, como complicación frecuente, aumenta el riesgo de embolismo cerebral isquémico y de otras complicaciones tromboembólicas<sup>4</sup>.

Entre los síndromes de insuficiencia cardiaca, aquellos con fracción de expulsión reducida (ICFEr) es el resultado de diferentes disparadores multifactoriales (ej., tóxicos, infecciosos, genéticos, etc.) y de mecanismos fisiopatológicos caracterizados por daño a los cardiomiocitos, disfunción endotelial, daño microvascular, remodelación ventricular inadecuada, disfunción ventricular, y finalmente activación del sistema renina - angiotensina - vasopresina-aldosterona<sup>5,6</sup>. Esta patología, clínicamente se caracteriza por un deterioro progresivo. Inicia como un estadio subclínico caracterizado por estabilidad clínica y ausencia de síntomas; posteriormente evoluciona hacia un estadio de insuficiencia cardiaca con manifestaciones clínicas caracterizado por exacerbaciones frecuentes, deterioro de la clase funcional, calidad de vida y finalmente, mortalidad prematura debida a disfunción del ventrículo izquierdo o muerte súbita arritmogénica.

El tratamiento actual de la ICFEr tiene como principal objetivo inhibir el sistema neurohumoral<sup>5</sup>, con una reducción significativa de la mortalidad. Sin embargo, a pesar del tratamiento hospitalario y ambulatorio basado en evidencia, los eventos adversos (EA) al alta (rehospitalización y mortalidad) siguen siendo altos. Por otro lado, datos clínicos y experimentales demuestran el papel crítico de la inflamación en los mecanismos fisiopatológicos de la ICFEr<sup>7-9</sup>. En las últimas etapas de la enfermedad se ha identificado una marcada activación de las células B con un consecuente aumento en las citocinas proinflamatorias y anticuerpos anti-corazón<sup>10</sup>, así como la activación del complemento, lo que sugiere una actividad del sistema inmune innato y adaptativo. Previamente nosotros demostramos niveles elevados del factor de necrosis tumoral alfa en pacientes con insuficiencia cardiaca congestiva avanzada<sup>7</sup>. En modelos experimentales, este mecanismo asociado a otras citoquinas proinflamatorias, se ha relacionado con disfunción del ventrículo izquierdo y miocardiopatía.<sup>7,8</sup>

Recientemente y por primera vez en pacientes con ICFe grave identificamos perfiles de anticuerpos asociados al miocardio. El 70% exhibió autoanticuerpos en tejido endomiocárdico y en otros tejidos observamos un significativo incremento de la actividad del complemento como evidencia de actividad inflamatoria local<sup>11,12</sup>. Esta evidencia sugiere que en la patogenia de la ICFe, hay una respuesta de linfocitos B a la liberación de proteínas cardíacas. El papel de las células B como posibles contribuyentes a la lesión celular depende de que si éstas o sus elementos responden a la neoexpresión de proteínas cardíacas anormales expuestas al sistema inmune<sup>13</sup>. También recientemente demostramos que las células B pueden ser mediadores primarios de lesiones en pacientes con miocardiopatía dilatada en los que se demostró actividad de los anticuerpos circulantes contra el receptor  $\beta$ , y que su eliminación mejora significativamente el curso de la enfermedad<sup>6,13</sup>. Nuestras observaciones proporcionan un mayor conocimiento de los procesos inmunológicos implicados en la ICFe, y nos permite considerar a este padecimiento como una patología neurohumoral-inflamatoria<sup>6</sup>.

También identificamos en ratones que el agotamiento farmacológico de linfocitos B con un anticuerpo monoclonal dirigido contra el marcador de células B CD-22, redujo la expresión de insuficiencia cardíaca, la dilatación ventricular, la fibrosis, con una mejor fracción de expulsión<sup>14</sup>. Por otra parte, es importante considerar que el rituximab, un anticuerpo monoclonal humanizado anti-CD20 (HMA-CD20), ha demostrado eficacia y seguridad en neoplasias hematológicas y enfermedades autoinmunes, al reducir el recuento total de células B. Además, se ha observado regresión de la disfunción ventricular cuando estos anticuerpos circulantes se neutralizaron en pacientes con trasplante cardíaco complicados con insuficiencia cardíaca grave<sup>15-19</sup>.

Toda esta evidencia sugiere la presencia de un fenómeno inflamatorio, potencialmente reversible, como mecanismo central en la génesis y en la progresión de la insuficiencia cardíaca. Basados en estos datos, consideramos que el HMA-CD20 podría ayudar al agotamiento de las células B activadas en pacientes con ICFe grave, con lo que posiblemente se podría disminuir la progresión del daño miocárdico y mantener la función ventricular. Debido a la naturaleza frágil de esta población y a la falta de evidencia del uso previo del HMA-CD20 el objetivo principal de nuestro estudio será determinar su seguridad en ICFe grave con respuesta inadecuada al tratamiento estándar.

## **Justificación**

El tratamiento actual de la ICFe se basa en realizar una inhibición efectiva neurohormonal. Sin embargo, persisten tasas altas de recurrencia, rehospitalización y mortalidad<sup>11</sup>. La nueva evidencia clínica y experimental respalda el papel de la inflamación en la patogénesis de los síndromes de insuficiencia cardíaca. Nosotros identificamos previamente en pacientes con ICFe grave, perfiles de anticuerpos asociados al miocardio<sup>10</sup>. Además, en un modelo murino, demostramos que el agotamiento farmacológico de los linfocitos B con un anticuerpo monoclonal contra el marcador CD22 disminuyó la expresión de insuficiencia cardíaca, menor grado de fibrosis y dilatación ventricular, con mejoría en la fracción de expulsión<sup>6,14</sup>. Por otra parte, en pacientes con trasplante cardíaco complicado con insuficiencia cardíaca grave por rechazo se ha utilizado el HMA-CD20 con éxito, observándose una regresión de la disfunción ventricular en la mayoría. Del mismo modo, el HMA-CD20 ha sido efectivo y seguro en neoplasias malignas hematológicas y enfermedades autoinmunes<sup>11,12</sup>. Finalmente, establecemos como hipótesis, que el uso del anticuerpo monoclonal HMA-CD20, es seguro en pacientes con ICFe y respuesta inadecuada al tratamiento estándar, como se ha demostrado recientemente en pacientes con infarto al miocardio con niveles altos de proteína C-reactiva de alta sensibilidad, tratados con un anticuerpo monoclonal humano anti-IL-beta<sup>20</sup>. La importancia de este estudio radica en que si demostramos la seguridad del HMA-CD20, estos resultados podrían extenderse a un estudio de efectividad en pacientes con ICFe para intentar mejorar la evolución.

## **7. Objetivo de estudio**

### **Objetivo primario**

Evaluar la seguridad del uso del HMA-CD20 en paciente con ICFEr, clase funcional NYHA III/IV, estables clínicamente y con respuesta inadecuada al tratamiento estándar.

#### **Objetivo secundario**

1. Determinar los cambios en las concentraciones de los biomarcadores neurohumorales con valor pronóstico en pacientes con ICFEr.

#### **Objetivos exploratorios**

1. Determinar por medio de resonancia magnética si el uso de HMA-CD20 evita la progresión de la fibrosis cardíaca.

#### **Hipótesis**

**H<sub>0</sub>:** El uso de un anticuerpo monoclonal humanizado anti-CD20 no es seguro en pacientes con ICFEr.

**H<sub>A</sub>:** El uso de un anticuerpo monoclonal humanizado anti-CD20 es seguro en pacientes con ICFEr.

#### **8. Diseño del estudio**

Estudio prospectivo de fase II, en un solo centro y en un grupo de intervención, para establecer seguridad del HMA-CD20 en pacientes de 40-60 años de edad con diagnóstico de ICFEr, estables, en clase funcional III/IV NYHA y con respuesta inadecuada al tratamiento estándar. Deberán tener una FE (fracción de expulsión)  $\leq$  40% determinada mediante ecocardiografía o resonancia magnética (RM). Este trabajo de fase II, intenta proporcionar evidencia de la seguridad y de los objetivos exploratorios con el HMA-CD20 utilizando la dosis aprobada en artritis reumatoide. Este estudio se considera esencial para el desarrollo de estudios posteriores.

#### **9. Descripción del entorno de estudio**

El estudio se llevará a cabo en el Hospital Zambrano Hellion, un hospital privado de tercer nivel de atención. La infusión será aplicada en el Centro de Cáncer de Mama, donde se cuenta con personal de enfermería capacitado y con experiencia en infusiones de quimioterapia.

#### **10. Criterios de inclusión y exclusión**

##### **Criterios de inclusión**

1. Hombres y mujeres (no embarazadas ni en periodo de lactancia)  $\geq$  40-60 años de edad.
2. Diagnóstico de ICFEr en clase funcional III/IV NYHA
3. Fracción de expulsión  $\leq$  40%, evaluada por medio de resonancia magnética o ecocardiograma con validez de 12 meses
4. Respuesta inadecuada al tratamiento estándar
5. Hospitalización o atención médica urgente por empeoramiento de insuficiencia cardíaca o infarto al miocardio en los últimos 12 meses
6. Diagnóstico de cardiomiopatía dilatada isquémica o no isquémica
7. Esperanza de vida mayor a seis meses
8. Haber firmado el FCI

##### **Criterios de exclusión**

1. Enfermedad cardíaca valvular grave o prótesis valvular (mecánica o biológica)
2. Antecedente de trasplante cardíaco, cardiomioplastía, cirugía de reducción del ventrículo izquierdo, valvuloplastía, implantación de dispositivo de asistencia ventricular o corrección quirúrgica de cardiopatías congénitas
3. Fibrilación auricular no controlada (FC  $>$  100 lpm), flutter auricular, fibrilación auricular sostenida y /o arritmias significativas como: taquicardia ventricular sostenida o no sostenida, bigeminismo o trigeminismo demostrado por Holter-48 durante la fase de exploración
4. Pacientes con cardio-desfibrilador automático implantable (CDAI) en los 3 meses previos al inicio del estudio
5. Infarto del miocardio que haya requerido reperfusión en los 30 días previos a la selección

6. Intervención coronaria percutánea en los 30 días previos a la selección
7. Tratamiento con fármacos inotrópicos (dobutamina, milrinona, levosimendan), diuréticos I.V. o vasodilatadores, en los 30 días previos a la selección
8. Mujeres embarazadas o en periodo de lactancia o aquellas que no llevan buen control anticonceptivo
9. Enfermedad tiroidea no tratada
10. Tasa de filtración glomerular <30 mL/min, basada en la fórmula de Cockcroft-Gault
11. Glomerulonefritis rápidamente progresiva, convulsiones o psicosis, neuropatía progresiva o miopatía
12. Hemoglobina: < 8.5 g/dL
13. Cuenta de leucocitos totales menor a 5000/mm<sup>3</sup>
14. Plaquetas: <100,000/mm, AST or ALT >2.5 × límite normal, a menos que se relacione a enfermedad primaria
15. Serología positiva para hepatitis B or C (antígeno de superficie de Hep B y anticuerpo de Hep C)
16. VIH positivo
17. Tratamiento previo con cualquier agente en investigación dentro de cuatro semanas previas al inicio de la fase de exploración o cinco vidas medias del medicamento en investigación (el que sea más largo)
18. Uso de vacuna atenuada, cuatro semanas previas a la selección
19. Tratamiento previo con HMA-CD20 o cualquier tipo de inmunoterapia
20. Antecedente de reacciones alérgicas graves o anafilaxia por anticuerpos monoclonales murinos o humanizados
21. Conocimiento de infección activa bacteriana, viral (excluyendo onicomycosis), micobacterias o cualquier otra infección (incluyendo tuberculosis o enfermedad por micobacterias atípica) o cualquier episodio mayor con necesidad de hospitalización o tratamiento con antibióticos I.V. en las 4 semanas previas a la evaluación, o antibióticos orales en un periodo de dos semanas previas a la selección
22. Administración continua de esteroides vía oral o intravenoso en las cuatro semanas previas
23. Falta de acceso venoso periférico
24. Malignidades concomitantes o previas, excepto carcinomas de piel no tipo melanoma resecaados curativamente o carcinoma in situ del cuello uterino
25. Antecedente de desorden psiquiátrico que pueda interferir con la participación en el protocolo, como depresión, síndrome bipolar o esquizofrenia
26. Pacientes con enfermedad pulmonar obstructiva crónica o enfisema
27. Cualquier otra disfunción metabólica, hallazgo en la examinación física o en pruebas de laboratorios que provoque sospecha de alguna enfermedad o condición donde se contraindique el uso del fármaco en investigación o que puede afectar la interpretación de los resultados o hacer que el paciente corra un alto riesgo de complicaciones del tratamiento
28. Participantes femeninas que no cumplan con un método anticonceptivo aprobado para el protocolo (apéndices).
29. Incapacidad de completar/asistir el estudio y procedimientos de seguimiento.

### **11a. Intervenciones del estudio**

Preparación, administración y dosificación

El HMA-CD20 es un concentrado líquido estéril, transparente, incoloro, sin conservadores. El producto se suministra a una concentración de 10 mg/ml en viales de un solo uso de 100 mg (10 ml) o 500 mg (50 ml). Está formulado para administrarse de forma intravenosa en cloruro de sodio 9 mg/ml, citrato de sodio dihidratado 7.35 mg/ml, polisorbato-80 0.7 mg/ml y agua estéril para infusión.

El pH se ajusta a 6.5. Los viales proporcionados a la farmacia tendrán etiquetas referenciando que son agentes de investigación específicos del estudio, con el número de registro correspondiente: 248M98 SSA.

El HMA-CD20 se administrará como infusión intravenosa (I.V.) de 1,000 mg, en dos ocasiones en el primer mes con una separación de 14 días entre cada infusión a partir de la visita basal. La dosis del HMA-CD20 será la misma en la visita basal y en la visita de semana 3.

#### Justificación de la dosis

En el estudio MIRROR, el grupo que recibió la dosis más alta de HMA-CD20 (dos dosis de 1,000 mg) a la semana 48 se asoció con una mejor respuesta clínica<sup>21</sup>. Se debe administrar metilprednisolona I.V. (100 mg) como premedicación a la infusión del HMA-CD20 para reducir la frecuencia y gravedad de las reacciones secundarias. El paracetamol y los antihistamínicos también se han administrado rutinariamente en ensayos clínicos antes de las infusiones del HMA-CD20<sup>22</sup>. El personal clínico estará a cargo de la administración de medicamentos del estudio, el control del paciente y la detección oportuna de eventos adversos serios (EAS) y eventos adversos no serios (EANS).

#### Preparación

Se usará la técnica aséptica para preparar y administrar el HMA-CD20 de acuerdo a lo reportado por Specks et al<sup>23</sup>. Se debe retirar la cantidad necesaria del HMA-CD20 y diluir a una concentración final de 1-4 mg/ml en una bolsa de infusión que contenga cloruro de sodio al 0.9%. El investigador puede prescribir una concentración de 4 mg/ml para reducir el volumen de la infusión. Se tiene que mover suavemente la bolsa para mezclar la solución, y finalmente, desechar cualquier porción no utilizada que quede en el vial<sup>24</sup>.

Los medicamentos parenterales deben inspeccionarse visualmente en busca de partículas y decoloración antes de su administración. El HMA-CD20 reconstituido es estable a una temperatura de 2°C a 8°C (36°F a 46°F) durante 24 horas<sup>22,23</sup>. Los viales de HMA-CD20 deben protegerse de la luz solar directa. No se deben congelar ni agitar. No se han observado incompatibilidades entre HMA-CD20 y las bolsas de polivinilcloruro o polietileno; sin embargo, debido a que la solución HMA-CD20 no contiene conservadores, la solución diluida debe mantenerse refrigerada (2-8 ° C)<sup>24</sup>.

#### Monitoreo

Las infusiones se realizarán en el área de quimioterapia del Centro de Cáncer de Mama del Hospital Zambrano Hellion que cuenta con personal certificado por la ACLS, medicamentos de reanimación cardio-pulmonar, dispositivos de monitorización y equipos de RCP. El personal clínico evaluará los signos vitales cada 15 minutos durante la primera hora de cada infusión y posteriormente cada 30 minutos y al menos, 1 hora después de la finalización de la infusión. El HMA-CD20 no debe administrarse como bolo I.V. porque pueden ocurrir reacciones de hipersensibilidad. La vía venosa debe permanecer en el participante durante al menos 1 hora después de la infusión para permitir la administración de medicamentos, en caso de una reacción secundaria. Los signos vitales de los participantes se monitorizará 1 hora después de la infusión, y se realizará un ECG para evaluar cualquier posible evento adverso arritmogénico. Posteriormente el paciente se retirará con Holter de 24 horas.

#### Premedicación

Un antagonista del receptor H2 de histamina (ej, ranitidina, 150 mg, V.O.), difenhidramina (50 mg, V.O.) o una dosis equivalente de antihistamínico similar, paracetamol (650 mg, V.O.) y metilprednisolona (100 mg, I.V.) 30 minutos antes de cada infusión de HMA-CD20. La premedicación puede atenuar los EANS relacionados con la infusión. Debido a que la hipotensión transitoria puede ocurrir durante la infusión del HMA-CD20, no se deben administrar medicamentos antihipertensivos al menos 12 horas antes del inicio de la infusión.

#### Primera infusión

La solución de HMA-CD20 para infusión debe administrarse I.V. con bombas de infusión a una velocidad inicial de 50 mg/hora. Si no se presentan eventos de hipersensibilidad o relacionados con la infusión, incrementar la velocidad de infusión 50 mg/hora cada 30 minutos, hasta un máximo de 400 mg/hora hasta alcanzar la dosis total de 1,000 mg.

#### Infusión subsecuente

La infusión posterior de HMA-CD20 se administrará a 100 mg/hora, si no ocurren reacciones adversas con la primera infusión, y posteriormente aumentar 100 mg/hora cada 30 minutos, hasta un máximo de 400 mg/hora, según se tolere.

#### EANS y EAS más comunes asociados con HMA-CD20

Las reacciones alérgicas y la anafilaxia, son los más comunes. La mayoría se desarrollan en las primeras 24 horas, observándose con mayor frecuencia después de la primera infusión; éstas pueden estar relacionadas con la liberación de citocinas u otros mediadores químicos, y rara vez, requieren la interrupción del tratamiento. Clínicamente, estas reacciones incluyen fiebre, escalofrío, náusea, mareo, prurito, urticaria o erupción cutánea, angioedema, edema laríngeo, estornudos, irritación u opresión de garganta, tos, ronquera, broncoespasmo, infiltrados pulmonares, hipoxia e insuficiencia respiratoria aguda<sup>22</sup>. Un evento adverso posible y que no ha sido bien categorizado es la neumonitis por hipersensibilidad caracterizada por disnea, hipoxemia, eosinofilia e infiltrados pulmonares<sup>25,26</sup>. Por lo tanto, el médico debe estar alerta para detectar estas reacciones.

La velocidad de infusión se reducirá o se interrumpirá temporalmente cuando las reacciones sean leves, y se reanudará a la mitad de la velocidad previa después de que desaparezcan los síntomas. La premedicación es vital para evitar eventos secundarios. En una serie de 465 pacientes con AR, las reacciones graves por la infusión disminuyeron 32% en el grupo que recibió dos infusiones de 500 mg de HMA-CD20 y 37% en el grupo que recibió dos infusiones de 1,000 mg del HMA-CD20 hasta 19% y 29%, respectivamente, después de la premedicación con glucocorticoides I.V.<sup>27</sup>.

#### Posible aumento en el riesgo de eventos isquémicos cardíacos

El mecanismo propuesto de infarto al miocardio inducido por HMA-CD20 podría ser la liberación de citocinas después de la muerte de las células B que conduce a la activación plaquetaria, vasoconstricción y ruptura de la placa<sup>28</sup>. El riesgo podría ser mayor en pacientes con aterosclerosis preexistente y placas vulnerables, así como, en aquellos con malignidad en estadio avanzado. La hidratación adecuada será una estrategia preventiva para trombosis. Además del síndrome coronario agudo y arritmias ventriculares. También se han descrito por la administración del HMA-CD20, casos de choque cardiogénico, disminución en la FEVI, miocardiopatías de Takotsubo y miocardiopatía no isquémicas<sup>27</sup>. La mayoría de estos eventos se han reportado en pacientes con AR<sup>29,30</sup>. En resumen, conocer el perfil de cardiotoxicidad del HMA-CD20 es importante para minimizar el riesgo de morbilidad/mortalidad relacionada con el tratamiento. Los SCA, arritmias cardíacas y miocardiopatía no isquémica pueden ocurrir dentro de las primeras 48 horas. La aparición de síntomas que pudieran atribuirse a un SCA o una ICFEr siempre deben ser considerados durante la infusión y debe investigarse cuidadosamente<sup>31</sup>. Los pacientes deben ser conscientes de que ésta es una complicación rara, aunque grave, del tratamiento con HMA-CD20.

#### Manejo de toxicidad

En caso de reacciones graves la infusión se detendrá. Es posible reiniciarla después de que los síntomas, o las alteraciones de laboratorio, se hayan resuelto por completo y después de un análisis de seguridad por el grupo de investigadores. Si se producen reacciones anafilácticas o de hipersensibilidad que amenazan la vida, los participantes serán retirados de la fase de tratamiento definitivamente.

Antes de cualquier infusión, se tomará una muestra de sangre para realizar BH y se enviará para su análisis. Si el recuento de leucocitos es inferior a 3,000 / mm<sup>3</sup>, se suspenderá la administración de la

infusión. La BH se repetirá en cada visita para una mayor seguridad del paciente. Si el recuento de leucocitos nuevamente es mayor de 3000/mm<sup>3</sup> y posterior a un análisis de seguridad por el equipo de investigadores se podría volver a administrar la infusión programada de HMA-CD20. Si el recuento no supera los 3,000/mm<sup>3</sup> dentro de las siguientes dos semanas, el participante será excluido y será tratado de acuerdo al mejor juicio clínico.

#### Ajustes de dosis permitidos e interrupciones del tratamiento del estudio

La infusión de HMA-CD20 debe interrumpirse si se producen reacciones graves. En los casos de reacciones leves a moderadas, la infusión se puede reanudar con una reducción del 50% (ej., de 100 mg/hora a 50 mg/hora) cuando el personal médico considere que los síntomas han remitido. Por ejemplo, algunas reacciones leves (ej., rubor) pueden no resolverse completamente a pesar de reducir la velocidad de infusión y administrar paracetamol y/o antihistamínicos adicionales. La velocidad de infusión se puede reanudar, tal como se describió anteriormente, cuando el personal clínico considere que los síntomas del paciente han mejorado.

Todas las reacciones a la infusión relacionadas con signos vitales deben resolverse por completo antes de reanudar la velocidad de infusión. Se recomienda el tratamiento de los síntomas leves a moderados con dosis adicionales de antihistamínicos y paracetamol. Se puede aplicar un tratamiento adicional con broncodilatadores o solución salina IV según lo indicado clínicamente. La epinefrina, los antihistamínicos y los glucocorticoides deben estar disponibles para su uso inmediato si se produce una reacción de hipersensibilidad.

#### **11b. Criterios de eliminación para discontinuar o modificar la intervención**

1. Progresión de la clase funcional NYHA (desde inicio del estudio)
2. Incremento del péptido natriurético cerebral y expresión de troponinas
3. Nueva infección pulmonar por antígenos oportunistas (*N. Jirovecci*, *A. Baumannii*, MRSA, VRSA)
4. Cualquier EAS sugestivo de hepatitis fatal o no fatal, insuficiencia hepática o sus complicaciones
5. ALT o AST > 3x valores normales con una bilirrubina total  $\geq$  2x valor normal
6. Recuento de leucocitos por debajo de 3000 / mm<sup>3</sup>
7. Reacciones anafilácticas o de hipersensibilidad que amenacen la vida

#### **11c. Estrategias para mejorar el cumplimiento del protocolo y procedimientos para monitorizar**

##### Procedimientos para monitorear la adherencia

El investigador principal o sub-investigadores debe evaluar clínicamente todos los valores de laboratorio de la visita de exploración para verificar si se encuentran dentro del rango normal de referencia. Todas las alteraciones de laboratorio consideradas clínicamente significativas por el investigador principal o sub-investigadores deben repetirse, una vez confirmadas, sin son clínicamente significativas y cumplen un criterio de exclusión el paciente será retirado del estudio. Si solo son clínicamente significativas se registrarán como un evento adverso no serio.

##### Exámenes de laboratorio

Todos los pacientes deben estar en ayuno de 8 horas, en los horarios programados. Se medirán los parámetros en el laboratorio central del Hospital Zanbrano Hellion. Se identificará cada tubo con número de registro, nombre completo y fecha de punción; se usará tubo de tapón lila y anticoagulante EDTA para inmunología y hematología, y tubo con tapón rojo con gel separador para química. Se realizará la venopunción para obtención de muestra y una vez se haya colectado se llevará al laboratorio donde se aislara el plasma y las células por aislamiento de gradiente (buffy-cot), posteriormente se criopreservarán las muestras, a -80°C el plasma y -150°C las células, hasta que se de por concluido el estudio. El análisis de citocinas será realizado utilizando el suero congelado en alícuotas pequeñas en nuestra metodología estandarizada usando flujo citometría (LEG ENDplex, Biolegend). Los fenotipos de células B serán evaluados por citometría de flujo usando concentraciones



de anticuerpos conjugados fluorescentes estandarizados. Todos los laboratorios serán verificados antes de cualquiera de las dos aplicaciones del tratamiento. Si faltan resultados las pruebas se realizarán nuevamente con las muestras ya tomadas.

#### **11d. Tratamiento prohibido y/o tratamiento concomitante durante la prueba**

1. Tratamiento con fármacos modificadores de la enfermedad (ej., metotrexato, azatioprina, ciclosporina)
2. Quimioterapia y/o cualquier fármaco biológico dirigido al sistema inmunitario (es decir, bloqueadores del factor de necrosis tumoral, inhibidores de topoisomerasa I, fármacos quimioterapéuticos de interferencia de purina, inhibidores de IL-1 beta)
3. Medicamentos inmunosupresores (ej., dosis altas de esteroides orales sistémicos)
4. Intervenciones estresantes como la colocación de catéteres centrales o toracocentesis
5. Consumo de alcohol
6. Inhibidores selectivos de la recaptación de serotonina.
7. Fármacos que inhiben el sistema inmunitario, como la azatioprina, la ciclosporina, el tacrolimus y el sirolimus.

No se han realizado estudios formales de interacción de drogas, por lo que todo los medicamentos mencionados previamente, se basan en reportes de caso y no en ensayos controlados aleatorizados.

## **12. Resultados**

### **Resultados primarios**

Debido a los casos reportados de angina, síndrome coronario agudo y arritmias, relacionadas con la infusión del HMA-CD20, consideramos como objetivo primario la seguridad del paciente definida como la ausencia de estos eventos. La FDA recomienda usarlo con precaución en pacientes con antecedentes de enfermedad cardiovascular<sup>25</sup>. Sin embargo, su perfil de cardiotoxicidad detallado y los efectos sobre la función cardíaca no se describen en la literatura médica. El HMA-CD20 debe suspenderse en caso de un evento cardíaco grave o potencialmente mortal<sup>2,29,32</sup>.

### **Resultados secundarios**

Como resultado secundario, evaluaremos las concentraciones de biomarcadores pre y post tratamiento como péptido natriurético cerebral tipo B, IL-1 $\beta$ , IFN- $\alpha$ , IFN- $\gamma$ , TNF- $\alpha$ , MCP-1, IL-6, IL-8, IL-10, IL-12p70, IL-17A, IL-18, IL-23, IL-33, células mononucleares, CD1d, CD19, CD5, CD20, IL-10, TNF- $\alpha$ , PIIINP, PINP, ICTP. Finalmente, como objetivos exploratorios serán evaluar la regresión de la respuesta inflamatoria cardiovascular local e impedir la progresión de la fibrosis, lo que permitiría conservar las dimensiones del ventrículo izquierdo, la FE y el mismo grado de fibrosis. Después de un infarto agudo de miocardio, insuficiencia cardíaca y en sujetos sin enfermedad cardiovascular manifiesta, las dimensiones basales del ventrículo izquierdo y la FE son predictores importantes de sobrevida. Por lo tanto, estos objetivos se medirán para estimar los efectos benéficos similares a los inhibidores de la enzima convertidora de la angiotensina y los bloqueadores beta que en la insuficiencia cardíaca parecen poseer la capacidad de inhibir o revertir la remodelación cardíaca. Se utilizarán las imágenes obtenidas por resonancia magnética con realce tardío de gadolinio para determinar y describir la remodelación cardíaca y, al hacerlo, evaluar si se cumplen los objetivos exploratorios de este trabajo. Estos objetivos como la FE y la fibrosis miocárdica serán evaluados mediante resonancia magnética.

### **Biomarcadores**

Durante el estudio se tomarán los biomarcadores descritos en el apartado anterior. Estos serán categorizados de acuerdo a su propósito y relevancia en: biomarcadores de disfunción ventricular, fibrosis, micronecrosis y de inflamación. Para la disfunción ventricular, se considerará el BNP (péptido natriurético tipo B), para daño celular agudo por micronecrosis, la troponina I evaluará el daño celular agudo por micronecrosis. Ambos se medirán en cada visita para seguridad de los pacientes. Para

poder cuantificar el comportamiento inflamatorio y el efecto del HMA-CD20 se evaluará el IL-1 $\beta$ , IFN- $\alpha$  (interferón alfa), IFN- $\gamma$  (interferón gamma), TNF- $\alpha$  (factor de necrosis tumoral alfa), MCP-1 (proteína quimioattractante del monocito 1), IL-6, IL-8, IL-10, IL-12p70, IL-17A, IL-18, IL-23, IL-33, así como células mononucleares, CD1d, CD19, CD5 y CD20. Finalmente, fibrosis se considerarán marcadores de colágeno PIIINP, PINP, ICTP. El panel de biomarcadores de inflamación, células mononucleares y fibrosis se tomará al inicio, y al final del estudio..

### **13. Cronograma de evaluación, intervenciones y visitas programadas**

#### **Pre-evaluación**

La pre-evaluación es un elemento clave para identificar exitosamente a los pacientes que serán evaluados en este estudio clínico. Aquellos pacientes con historia reciente de evento cardiovascular o de un procedimiento quirúrgico en los últimos 30 días antes de su ingreso deberán ser cuidadosamente evaluados. La visita de pre-evaluación deberá realizarse después de la revisión de los expedientes para determinar la elegibilidad de los mismos y obtener radiografía torácica, Quantiferon, Holter-48 y ECG basal.

#### **Evaluación**

Incluirá historia médica completa y análisis de la función hepática y renal, así como de alguna posible enfermedad oncológica. El tiempo entre la evaluación y el inicio tendrá una duración de dos semanas. Los pacientes serán numerados y añadidos a una base de datos tan pronto como las pruebas de elegibilidad sean realizadas. No se permitirá la re-evaluación de los pacientes. Los pacientes deberán estar estables clínicamente al momento de la evaluación. El investigador se encargará de verificar que los participantes cumplan con todos los criterios de inclusión y ninguno de los criterios de exclusión.

Se interrogará a los pacientes sobre historia de frecuencia cardíaca irregular, dolor torácico de inicio reciente, enfermedad pulmonar o renal, sistema inmune deficiente o presencia de alguna de las siguientes infecciones graves:

- Virus de hepatitis B (HBV)
- Virus de hepatitis C (HCV)
- Citomegalovirus (CMV)
- Virus herpes simplex (HSV)
- Parvovirus B19
- Virus de Varicella-Zoster
- Virus del Nilo Occidental.

O aquellos que cuenten con vacunación reciente o alguien que tenga un familiar que esté programado para recibir vacunación, esto debido a que algunos tipos de vacunas pueden permitir la diseminación de la enfermedad en personas con deficiencia de sistema inmune. Mujeres fértiles deberán usar doble método anticonceptivo (preservativo junto con diafragma) mientras estén bajo tratamiento con HMA-CD20 y por 12 meses posteriores a la finalización del tratamiento.

#### **Pacientes que descontinúan el tratamiento en estudio.**

Cualquier paciente que suspenda el tratamiento retire el consentimiento puede reiniciar el tratamiento a discreción del investigador, independientemente del tiempo de tratamiento del estudio con HMA-CD20.

Aquellos pacientes que decidan interrumpir el tratamiento, por cualquiera que sea la causa, tendrán

derecho a visitas de seguimiento programadas y podrán ser admitidos en el departamento de urgencias del Hospital Zambrano Hellion, si se presenta algún EAS relacionado con el medicamento del estudio.

### **Conducta de estudio y análisis provisional**

#### Calendario de las visitas

##### Pre-evaluación

La visita de pre-evaluación se realizará para determinar la elegibilidad de los pacientes y obtener un ECG y radiografía inicial; además, se tomará Holter de 48 h para evaluar la presencia de arritmias potencialmente graves y se detectará presencia de tuberculosis utilizando la prueba de Quantiferon.

##### Visita de selección (primer visita)

Las siguientes evaluaciones clínicas y de laboratorio se realizarán durante esta visita para todos los participantes, y se completarán dentro de los 14 días antes del inicio del procedimiento de intervención:

- ICF
- Criterios de inclusión y exclusión
- Demografía
- Historia médica
- Medicamentos concomitantes en los últimos 30 días
- Signos vitales (presión arterial, pulso, temperatura, frecuencia respiratoria)
- Cuestionario de Minnesota
- IMC
- Examinación física
- ECG
- Hematológico: BH
- Química: BUN, creatinina
- Colección de suero para el análisis de citocinas y aislamiento de células mononucleares
- Troponina I
- Péptido natriurético cerebral
- Prueba de embarazo en uroanálisis
- Tasa de filtración glomerular
- Biomarcadores de disfunción ventricular, fibrosis y de inflamación
- Resonancia magnética cardiovascular

##### Visitas de aplicación de HMA-CD20 (visita basal y la 5ta visita, semana 1 & 3)

Los siguientes procedimientos y evaluaciones se realizarán en la visita basal y en la quinta visita.

- Educación del paciente referente a EANS y EAS
- Exploración física
- NYHA
- Signos vitales: Al momento de la infusión, se evaluarán los signos vitales, así como la pulso oximetría, cada 15 minutos por una hora, posteriormente, cada 30 minutos y finalmente, por lo menos una hora después de haber completado la administración de la infusión.
- Evaluación de IMC
- Hematológico: BH
- Química: BUN, creatinina
- Colección de suero para el análisis de citocinas y aislamiento de células mononucleares
- Troponina I
- Péptido natriurético cerebral
- Prueba de embarazo en uroanálisis

- Toma de muestra altruista
- Tasa de filtración glomerular
- Aplicación de pre-medicación como se estableció previamente.
- Infusión de HMA-CD20 posterior a un tiempo de una hora desde la pre-medicación
- Holter de 24 h posterior a la infusión

#### Visita de seguridad de 24 h posterior a la aplicación del fármaco

- Exploración física
- NYHA
- Signos vitales
- Troponina I
- Péptido natriurético cerebral
- Detección de eventos adversos cardiovasculares

#### Visita de seguridad (cuarta, a partir de la sexta hasta la décima visita)

- Exploración física
- NYHA
- Signos vitales
- Evaluación de IMC
- ECG
- Hematológico: BH
- Química: BUN, creatinina
- Colección de suero para el análisis de citocinas y aislamiento de células mononucleares
- Troponina I
- Péptido natriurético cerebral
- Proteína C reactiva de alta sensibilidad
- Prueba de embarazo en uroanálisis
- Tasa de filtración glomerular
- Péptido natriurético cerebral

#### Visita final (visita once)

- Signos vitales (presión arterial, pulso, temperatura, frecuencia respiratoria)
- Exploración física
- NYHA
- ECG
- Aplicación del cuestionario de Minnesota
- Hematológico: BH
- Química: BUN, creatinina
- Colección de suero para el análisis de citocinas y aislamiento de células mononucleares
- Troponina I
- Péptido natriurético cerebral
- Biomarcadores de disfunción ventricular, fibrosis e inflamación
- Prueba de embarazo en uroanálisis
- Tasa de filtración glomerular
- Resonancia magnética cardíaca

#### Visita por interrupción de la terapia de estudio

Se requiere una visita de interrupción del medicamento en estudio, en caso de un retiro permanente. Las evaluaciones de esta visita serán las mismas de la visita del sexto mes.

### Visita de finalización

Todo paciente que haya ingresado al estudio y que haya completado el tiempo de observación definido, realizará una visita de finalización en la cual se evaluarán todos los parámetros clínicos y biomarcadores. Cualquier participante que haya suspendido permanentemente la terapia del estudio y haya retirado el consentimiento, se le pedirá que complete una visita de terminación. Las evaluaciones para esta visita deben incluir las mismas evaluaciones requeridas en la visita del sexto mes.

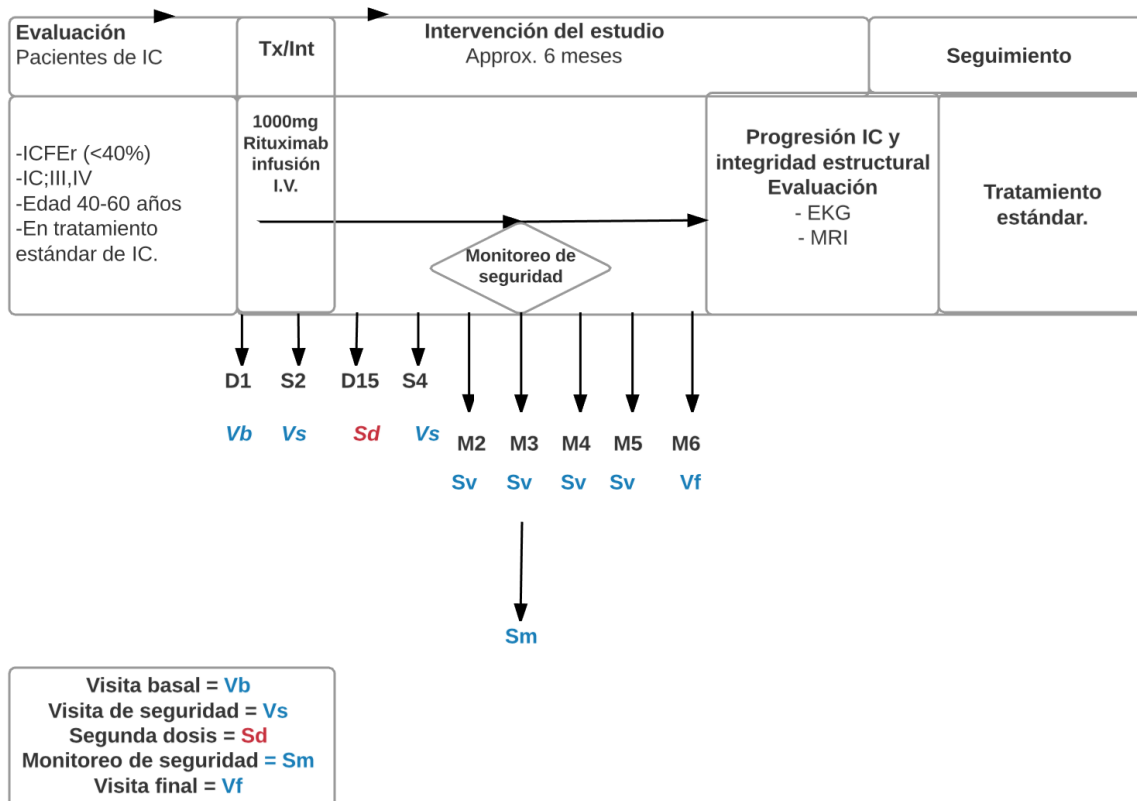

|           | Pre-evaluación | Evaluación |       | Proc 1 | V24 h | v1 | Proc 2 | v2  | v3  | v4  | v5   | Seguridad |     |
|-----------|----------------|------------|-------|--------|-------|----|--------|-----|-----|-----|------|-----------|-----|
| Visitas   |                | v1         | v2    | v3     | v4    | v5 | v6     | v7  | v8  | v9  | v10  | v11       | v12 |
| Dia/Meses |                | D(-14)     | D(-1) | D1     | D3    | D7 | D15    | D22 | D22 | D22 | D108 | M5        | M6  |
| FCI       |                | x          |       |        |       |    |        |     |     |     |      |           |     |

|                                               |   |   |   |   |   |   |   |   |   |   |   |   |   |
|-----------------------------------------------|---|---|---|---|---|---|---|---|---|---|---|---|---|
| Criterio I/E                                  | X | x |   |   |   |   |   |   |   |   |   |   |   |
| Fechas de infusión                            |   |   |   | X |   |   | X |   |   |   |   |   |   |
| Evaluación clínica                            | X | x | x | x | x | x | X | X | X | x | x | x | x |
| Historia clínica                              | X | x | x | X |   | x | X | X | X | x | x | x | x |
| Signos vitales                                | X | x | x | X | x | x | X | X | X | x | x | x | x |
| Exploración física                            | X | x | x | X | x | x | X | X | X | x | x | x | x |
| ECG                                           | X | x | x | X | x | x | X | X | X | x | x | x | x |
| Placa de tórax                                | X |   |   |   |   |   |   |   |   |   |   |   |   |
| QFT-G                                         | X |   |   |   |   |   |   |   |   |   |   |   |   |
| Rutina laboratorio ej. (BH, QS, ES, Tp, TTp,) |   | x | X | X |   | x | X | X | X | x | x | x | x |
| Test de embarazo (urinario)                   |   | x | X | X |   | x | X | X | X | x | x | x | x |
| Citoquinas y marcadores inflamatorios.        |   | X |   |   |   | X |   |   |   |   |   |   | X |
| Tasa de filtración glomerular                 |   |   | X | X | x | x | X | X | X | x | x | x | x |
| BNP                                           |   |   | X | X |   | x | X | X | X | x | x | x | x |
| Troponina I                                   |   |   | X | X |   | x | X | X | X | x | x | x | x |
| Marcadores de colágeno (PIIINP, PINP, ICTP)   |   |   | x |   |   |   |   |   |   |   | x |   |   |

|                                                 |   |   |   |   |   |   |   |   |   |   |   |   |   |
|-------------------------------------------------|---|---|---|---|---|---|---|---|---|---|---|---|---|
| Holter ECG 24 y 48 h                            | X |   |   | X |   |   | X |   |   |   |   |   |   |
| NYHA                                            | X | x | X | X | x | X | X | X | X | X | X | X | X |
| Resonancia magnética                            |   |   | X |   |   |   |   |   |   |   |   |   |   |
| Muestra altruista                               |   |   |   | X |   |   |   |   |   |   |   |   |   |
| Encuesta Minnesota sobre Insuficiencia cardiaca |   | x |   |   |   |   |   |   |   |   |   |   |   |

FCl; Formato de consentimiento informado; I/E, Criterio de inclusión y exclusión; ECG, electrocardiogram; QFT-G Quantiferon-G; BNP, Péptido Natriurético Cerebral; NYHA, New York Heart Association; 6mWD Prueba de caminata de 6 minutos.

Programación de las visitas:

- Procedimiento de intervención: Proc
- Visita: V
- Visita a las 24 hrs: v24
- Visita de seguridad: Vs
- Días de estudio: D
- Meses de estudio: M

| Visita No. | Visita                                       | Día de estudio                      | Visita ventana                        |
|------------|----------------------------------------------|-------------------------------------|---------------------------------------|
| 1          | Evaluación                                   | 14 días antes de la 1ra infusión    | Antes de la visita basal              |
| 2          | Evaluación                                   | 7 días antes de la primera infusión | Antes de la visita basal              |
| 3          | Visita de basal:infusión 1                   | 1                                   | Dentro de 14 días desde el evaluación |
| 4          | Visita de seguridad                          | 7                                   | ±36 horas del día acordado            |
| 5          | Infusión 2                                   | 15                                  | ±36 horas del día acordado            |
| 6          | Visita de seguridad                          | 22                                  | ±10 días del día acordado             |
| 7          | Monitoreo de seguridad + visita de seguridad | 52                                  | ±10 días del día acordado             |
| 8          | Visita de seguridad                          | 82                                  | ±10 días del día acordado             |

|    |                     |         |                           |
|----|---------------------|---------|---------------------------|
| 9  | Visita de seguridad | 108     | ±10 días del día acordado |
| 10 | Visita de seguridad | 5to mes | ±10 días del día acordado |
| 11 | Visita final        | 6to mes | ±10 días del día acordado |

#### **14. Tamaño de muestra**

Con base en la disponibilidad de pacientes con insuficiencia cardíaca en este centro médico y la naturaleza del proyecto, se consideró una muestra conveniente de 10 pacientes para evaluar la seguridad de HMA-CD20.

#### **15a. Planes de entrada de datos, codificación, seguridad y almacenamiento,**

Los datos serán registrados en una base de datos que estará a cargo de los sub-investigadores y serán los únicos con acceso a los datos y posteriormente serán analizados por el equipo.

#### **15b. Estrategias para lograr el objetivo de la muestra.**

Los pacientes se reclutarán de la clínica de insuficiencia cardíaca del Instituto de Cardiología y Medicina Vascul, del Hospital Zambrano Hellion.

#### **16a. Métodos estadísticos para analizar los resultados primarios y secundarios.**

Las variables continuas se presentarán como medias y desviación estándar (SD). Las variables categóricas se presentarán como frecuencias y porcentajes. Se realizarán comparaciones estadísticas entre los datos iniciales de la visita inicial con datos del tercer y sexto mes, respectivamente. El análisis del primer punto final será descriptivo, teniendo en cuenta la incidencia de EANS relacionados con el medicamento. Las comparaciones entre las variables demográficas, los resultados de laboratorio, las medidas de la función cardiovascular y los biomarcadores en las visitas pre-especificadas se realizarán mediante pruebas no paramétricas (prueba de Mann-Whitney). Estos resultados serán solo exploratorios. La significancia estadística se asumirá con un valor de p unilateral <0.05.

#### **16b. Métodos para cualquier análisis adicional (ej., subgrupo y análisis ajustados)**

En el estudio no se consideraron subgrupos.

#### **16c. Análisis de población que no cumpla con adherencia al protocolo**

La estrategia de seguimiento de pacientes está diseñada para evitar la pérdida de las visitas programadas durante el protocolo.

#### **17a Composición del comité de seguimiento de datos**

Los investigadores son responsables del seguimiento de todos los datos.

#### **17b Descripción del análisis provisional**

##### **Monitoreo de Seguridad**

Un monitoreo de seguridad y futilidad se realizará durante el estudio para evitar exponer a los pacientes a tratamientos potencialmente peligrosos o riesgos innecesarios. Se realizará cuando cinco de los sujetos hayan alcanzado los 90 días de observación. El objetivo será examinar los efectos del tratamiento con HMA-CD20 en puntos finales de seguridad; incidencia de SCA y arritmias como eventos cardiovasculares potencialmente fatales. Si más de tres pacientes presentan uno de estos EAS, el estudio se detendrá por comprometer la seguridad del paciente<sup>30</sup>. A pesar de suspender la intervención, los pacientes inscritos en el estudio continuarán con visitas de seguimiento indefinidamente en el Hospital Zambrano Hellion.



## **18. Auditoría**

El grupo de investigadores evaluarán que la base de datos cumpla con los estándares de documentación y registro para asegurar la integración de los datos cada 45 días.

## **19. Evaluación, recolección, información y manejo de EANS**

### *Registro de EANS y EAS*

Se debe prestar atención especial al estado del paciente durante todo el estudio. Al ingresar, se tomarán los siguientes estudios y pruebas diagnósticas: ECG, Holter-48h, Quantiferón, radiografía de tórax, BH, BUN, tasa de filtración glomerular y pruebas de función hepática, para evaluar el estado del paciente. La BH se tomará en cada visita para evaluar posibles anomalías. Determinar el panel viral y el antígeno de superficie de la hepatitis B (HBsAg) para evaluar si el estado inmune se mantiene sin cambios. Estos se tomarán cada dos meses en pacientes con antecedentes de infección por VHB y/o pacientes en contacto con personas con VHB. También determinará troponina y péptido natriurético tipo B.

### *Reporte de eventos adversos*

El grupo de investigadores estará atento a la presencia de EAS y EANS, a través de un monitoreo constante los cuales deberán documentarse en el expediente clínico. Si se detectan EAS deben informarse al investigador principal y reportarse dentro de las primeras 24 horas a los comités de investigación y COFEPRIS.

### *Presencia de EANS*

Personal competente supervisará la preparación del paciente, la premedicación adecuada del mismo y todo el periodo de infusión, tratando de evitar EANS. En caso de que ocurra un EANS, estará disponible atención de emergencia en el centro en donde se administrará la infusión. Las reacciones graves característicamente ocurren durante la primera infusión en un lapso de 30-120 minutos. Entre los EANS provocados por la infusión del HMA-CD20 incluye: hipotensión, angioedema, hipoxia, broncoespasmo, infiltrados pulmonares, síndrome de dificultad respiratoria aguda, infarto al miocardio, fibrilación ventricular, choque cardiogénico, eventos anafilácticos o muerte. Por lo tanto, el personal del estudio estará al tanto para detección y manejo estas reacciones.

### *Manejo en caso de reacciones adversas al HMA-CD20*

Puede usarse inicialmente antihistamina intravenosa (clorfenamina 10 mg I.V.) y/o glucocorticoides (hidrocortisona 100 mg I.V.). En casos más graves (edema facial, disfonía, estridor, insuficiencia respiratoria o colapso inminente), se debe usar adrenalina (1mg = 1ml de adrenalina en solución acuosa 1/1,000, de 0.3 a 0.5 mg en una sola dosis. Este tratamiento se puede repetir cada 5 a 15 minutos según la gravedad y la tolerancia del paciente), más oxígeno continuo, con monitorización de la saturación arterial de O<sub>2</sub>, fluidos I.V. y control del estado clínico.

## **20a. Presentación para aprobación de Comités de ética y de investigación**

Antes del inicio del estudio el investigador principal presentará el protocolo y el FCI, al Comité de Ética en Investigación y al Comité de Investigación, que deberán revisarlos y aprobarlos. Además, ambos comités deberán aprobar cualquier material de reclutamiento para los pacientes.

## **21. Planes para la estructura y aprobación de una enmienda**

Cualquier modificación a este protocolo requiere una enmienda basada en hallazgos que el grupo de investigación considere importantes para la seguridad del paciente. Esto deberá documentarse, explicando la causa y la posible propuesta de solución. Esta propuesta de enmienda deberá enviarse a los comités de Ética e Investigación y COFEPRIS para su potencial aprobación. Si la enmienda procede, se debe generar una nueva versión del FCI el cual deberá ser aprobado por dichas instancias antes de su implementación y todos los pacientes deberán ser re consentidos.

### **22a. Quién obtendrá el FCI**

El investigador o los sub-investigadores serán los encargados de explicar a cada paciente los objetivos, métodos y riesgos asociados a la investigación. Al paciente y a sus familiares se le dará una explicación verbal de todo el protocolo de estudio. Al terminar, se les entregará la FCI y se les dará el tiempo necesario para que lean todo el FCI. Al finalizar, se tendrá una sesión en conjunto para que el paciente y familiares externen todas sus dudas y estas sean contestadas cabalmente por el investigador principal o los sub-investigadores. Una vez contestadas todas las dudas, al paciente se le solicitará su participación voluntaria en el estudio. Si acepta él o su representante legal firmará la FCI y pondrán la fecha con su puño y letra en presencia de dos testigos imparciales. Quienes al terminar también firmarán con su puño y letra, pondrán fecha, parentesco con el paciente y domicilio particular. En el expediente clínico de cada paciente se documentará el proceso de FCI, indicando que se obtuvo FCI por escrito antes de participar en el estudio. Los pacientes deben firmar la versión más reciente del FCI durante su participación en el estudio. El paciente o el representante legal recibirán una copia de cada FCI firmado. Todas las formas de consentimiento firmadas y fechadas permanecerán en el archivo de estudio de cada paciente o archivo central y estarán disponibles para monitoreos de estudio en cualquier momento.

### **22b. Disposiciones de consentimiento adicional para la recopilación y el uso de datos de participantes y muestras biológicas**

Dentro del FCI se le solicitará al paciente obtener una muestra de sangre altruista para investigaciones posteriores.

### **23. Resguardo de datos y confidencialidad**

Toda la información de los participantes será recopilada por los sub-investigadores y será almacenada en una base de datos a la que únicamente el equipo de investigadores tendrá acceso.

### **24. Declaración de interés**

Los investigadores declaran no tener ningún conflicto de interés.

### **25. Previsiones para la atención secundaria y posterior al juicio, y para la indemnización de quienes sufren daños por la participación en un juicio**

Los pacientes en el estudio tienen el riesgo de presentar cualquier evento cardiovascular, infeccioso y/o iatrogénico agudo, así como cualquier EAS relacionado con el medicamento del estudio. A los pacientes se les dará a conocer todos los riesgos antes de cualquier procedimiento y firmarán el FCI voluntariamente. Los pacientes que participan en el estudio y que tengan un EAS relacionado con el medicamento del estudio se atenderán en el Hospital Zambrano Hellion. El primer contacto será el servicio de urgencias quien avisará al investigador principal o sub-investigadores. El paciente será evaluado en dicho servicio y si se establece un EAS relacionado al medicamento del estudio se realizarán las pruebas diagnósticas y tratamiento necesarios para su resolución. Si así lo requiere, el paciente será hospitalizado o ingresado al área de terapia intensiva. Su participación en este estudio estará cubierta por la aseguradora Grupo Mexicano de Seguros S.A. de C.V. (GMX seguros), con el número de póliza: 03-069-07000002-0000-01 de responsabilidad civil profesional-pruebas clínicas.

### **26. Planes de publicación**

Si el estudio se logra terminar con el número de pacientes planeado, los investigadores publicarán los resultados en una revista de impacto para la comunidad científica internacional.

### **27. Formulario de consentimiento del modelo y otra documentación relacionada entregada a los participantes y sustitutos autorizados**

Se presenta por separado

**28. Planes para la recolección, evaluación de laboratorio y almacenamiento de muestras biológicas para análisis genéticos o moleculares en el ensayo actual y para su uso futuro en estudios auxiliares, si corresponde.**

Todas las anomalías de laboratorio que se consideran clínicamente significativas por el IP o sub-investigador deben repetirse, una vez confirmadas, las anomalías de laboratorio clínicamente significativas y que cumplan con el criterio de exclusión deben ser evaluados además por el IP o el sub-investigador y ser registrado capturaron como EANS.

**Química sanguínea**

El perfil químico incluye: sodio, potasio, cloruro, bicarbonato, nitrógeno ureico en sangre, creatinina, calcio, fósforo, glucosa y ácido úrico.

**Panel Hematológico**

El panel de hematología incluye: plaquetas, leucocitos con diferencial si es anormal (% y recuentos absolutos), hematocrito, hematófies, hemoglobina, VCM, CHCM y HCM.

**Pruebas de Función Hepática**

El panel de PFH incluye: ALT, AST, bilirrubinas (total, indirecta y directa) se llevará a cabo en la misma muestra.

**Muestra de orina (tira reactiva y cuantitativa)**

La prueba de análisis de orina incluye: color, apariencia, gravedad específica, esterasa de leucocitos, pH, proteína, glucosa, cetonas, sangre, y nitratos. Análisis de orina microscópico se realizará sobre muestras que resulten anormales en esterasa de leucocitos, proteínas y nitrato. Esta prueba será evaluada en el laboratorio central.

**Prueba de embarazo en orina**

Al existir prueba positiva en orina, se realizará en suero, de salir positivo se retira elimina del estudio.

**Colesterol sérico**

Se tomarán muestras de sangre para el colesterol total (CT), colesterol de alta densidad (HDLC), colesterol de baja densidad (LDLC), colesterol de muy baja densidad (VLDLC).

## Apéndice 1

### Lista de abreviaciones

*ALT: Alanina aminotransferasa*

*AST: Aspartato aminotransferasa*

*CD-20: Antígeno de linfocito-B*

*EANS: Evento adverso no serio*

*EAS: Evento adverso serio*

*ICC: Insuficiencia cardiaca congestiva*

*FE: Fracción de expulsión*

*ICFEr: Insuficiencia cardiaca con fracción de expulsión reducida*

*HMA-CD20: Anticuerpo monoclonal humano anti-CD20*

*FCI: Forma de consentimiento informado*

*IAM: Infarto agudo al miocardio*

*6MWD: Prueba de la marcha de los 6 minutos*

*RM: Resonancia magnética*

### Glosario

|                                     |                                                                                                                                                                                       |
|-------------------------------------|---------------------------------------------------------------------------------------------------------------------------------------------------------------------------------------|
| <i>Evaluación</i>                   | <i>Un procedimiento utilizado para generar los datos requeridos por el estudio</i>                                                                                                    |
| <i>Inscripción</i>                  | <i>Momento de entrada del paciente en el estudio; el punto en el que se debe obtener FCI (es decir, antes de comenzar cualquiera de los procedimientos descritos en el protocolo)</i> |
| <i>Medicamento en investigación</i> | <i>El medicamento del estudio cuyas propiedades se están probando en el estudio</i>                                                                                                   |
| <i>Número de paciente</i>           | <i>Número asignado a cada paciente que se inscribe en el estudio. Cuando se combina con el número del centro, se crea un identificador único para cada paciente en el estudio.</i>    |
| <i>Variable</i>                     | <i>Información utilizada en el análisis de datos; derivada directa o indirectamente de los datos recopilados utilizando evaluaciones especificadas en momentos específicos</i>        |

### Definiciones

#### ICFEr

De acuerdo a las recomendaciones actuales de la Sociedad Europea de Cardiología, insuficiencia cardiaca con fracción de expulsión reducida se define en pacientes con o sin expresión clínica por la demostración objetiva de una FE < 40% por ecocardiograma o resonancia magnética.

#### Muerte de causa no cardiovascular

Mortalidad no relacionada con insuficiencia cardiaca, síndromes coronarios agudos, accidente cerebrovascular o arritmias cardiacas.

### Tratamiento estándar y óptimo

Tratamiento con inhibidores de la enzima convertidora de angiotensina, bloqueador de los receptores de angiotensina II, bloqueador beta, diurético y antagonistas de los receptores de aldosterona. Los sujetos deben recibir dosis óptimas y estables durante al menos 30 días antes del inicio; se acepta el uso de dispositivos de resincronización. El dispositivo debe haberse implantado al menos tres meses antes de la evaluación; del mismo modo, todos recibirán recomendaciones sobre modificaciones en el estilo de vida como evitar del hábito de fumar, consumo de alcohol y drogas ilícitas.

### Clase funcional New York Heart Association

|                         |                                                                                                                                                                                                                                                                            |
|-------------------------|----------------------------------------------------------------------------------------------------------------------------------------------------------------------------------------------------------------------------------------------------------------------------|
| Clase I<br>(Leve)       | Sin limitación de actividad física. La actividad física ordinaria no causa fatiga, latido cardíaco acelerado/irregular (palpitaciones) o dificultad respiratoria (disnea)                                                                                                  |
| Clase II<br>(Leve)      | Ligera limitación de la actividad física. Cómodo en reposo, pero la actividad física ordinaria produce fatiga, latidos cardíacos rápidos/irregulares (palpitaciones) o dificultad para respirar (disnea).                                                                  |
| Clase III<br>(Moderada) | Marcada limitación de la actividad física. Cómodo en reposo, pero una actividad inferior a la normal provoca fatiga, latidos cardíacos rápidos/irregulares (palpitaciones) o dificultad para respirar (disnea).                                                            |
| Clase IV<br>(Grave)     | No se puede realizar ninguna actividad física sin incomodidad. Los síntomas de fatiga, latidos cardíacos rápidos/irregulares (palpitaciones) o dificultad para respirar (disnea) están presentes en reposo. Si se realiza alguna actividad física, la incomodidad aumenta. |

### Respuesta inadecuada al tratamiento estándar

Se considerará en aquellos hospitalizados en los últimos 12 meses por insuficiencia cardíaca sin una explicación (suspensión de tratamiento) o que tengan un BNP > 600 pg/dL, o que hayan requerido tratamiento con diuréticos por vía intravenosa.

### Progresión de la insuficiencia cardíaca

La clasificación de NYHA será la piedra angular para determinar la progresión de la insuficiencia cardíaca. Si la condición del paciente cambia la clase funcional (ej., clase III a clase IV) o empeora (ej., edema pulmonar agudo, síndrome de bajo gasto cardíaco o shock cardiogénico), se considerará progresión. También se considerará, hospitalización, visitas al departamento de urgencias por complicaciones de insuficiencia cardíaca o nuevo uso de diuréticos I.V., incremento de los valores de BNP y troponina.

## Apéndice 2

### Resonancia Magnética

Las imágenes se obtendrán con un 1.5-T escáner Siemens Avanto usando una bobina de red en fase durante retención de la respiración (≈ 6 segundos). Las imágenes de precisión serán adquiridas tanto en eje corto (cada 1 cm a lo largo de todo el ventrículo izquierdo (VI)) y 3 planos de eje largo.

#### Adquisición de imágenes:

Plano sagital, coronal y axial

Explorador cámara oblicua

Eje explorador corto

Short stack cine eje (6 mm de espesor de diapositivas con hueco de 4mm)

Cines en eje largo: 2 cámaras, la cámara 3, 4 cámara

Los parámetros típicos: La resolución temporal por fase 30-40 msec, en resolución del plano 1,5-2,0 mm x 1,5-2,0 mm

Las imágenes obtenidas de cada paciente serán colocadas aleatoriamente para ser analizadas cuantitativamente por un observador experimentado cegado a los hallazgos previos de cada paciente.

#### *Análisis funcional*

Se utilizará el Software CVI42 (Círculo Cardiovascular Imaging, Calgary, Canadá) para el análisis de imágenes. Las imágenes serán verticalmente ordenadas de acuerdo a la posición de corte, desde la base hasta el ápice, y horizontalmente según el momento del ciclo cardíaco de fin de diástole y de fin de sístole). Después de hacer zoom sobre la región de interés (VI / VD), el endocardio y contornos epicárdicos de VI y VD se dibujan (excluyendo los músculos papilares). Desde el protocolo de la función de cine, varios parámetros se cuantifican incluyendo, el volumen diastólico final, el volumen sistólico final, la masa ventricular, la fracción de expulsión ventricular izquierda global, el volumen de expulsión global, el gasto cardíaco global, espesor de la pared regional (17 segmentos modelo AHA) y engrosamiento de la pared regional. Se expondrá a los pacientes al campo magnético de la resonancia. El equipo de resonancia magnética no expone a los sujetos de investigación a radiación. Se revisarán las contraindicaciones de cada paciente para el estudio y una vez confirmada la seguridad del paciente se firmará el consentimiento para el procedimiento. Se excluyen a los pacientes con dispositivos electrónicos cardiacos (marcapasos, desfibriladores), cuerpos extraños y metálicos en ojos u otros lugares con riesgo vital. El gadolinio usado como medio de contraste para la resonancia magnética de corazón puede causar reacciones adversas en diversos grados, son muy poco frecuentes, la mayoría leves. Se ha estimado su incidencia en 0.07% - 2.4%. Las reacciones que se pueden presentar incluyen frialdad en el sitio de inyección del contraste, náusea, cefalea, parestesias, mareos y prurito. Reacciones parecidas a una respuesta "alérgica" son muy inusuales, y su frecuencia varía en el rango de 0.004% - 0.7%. Rash y urticaria son las más frecuentes de este grupo y muy raramente broncoespasmo. Reacciones anafilácticas no alérgicas son extremadamente raras (0.001% a 0.01%). En una serie acumulada de 687,000 dosis solo ocurrieron 5 reacciones severas. Los agentes de gadolinio son considerados sin nefrotoxicidad a las dosis aprobadas para realizar resonancia magnética nuclear. Se puede presentar esclerosis nefrogénica sistémica en pacientes con antecedente de insuficiencia renal avanzada (depuración de creatinina calculada menor a 15mL/min). Se excluyen del estudio a los pacientes con insuficiencia renal avanzada y alergia reportada al medio de contraste utilizado.

#### ***Minnesota Living with Heart Failure Questionnaire (MLHFQ)***

El MLHFQ evaluará los síntomas de insuficiencia cardíaca y su impacto en los sujetos. Es una medida de autoevaluación del paciente que evalúa la respuesta terapéutica a las intervenciones para la insuficiencia cardíaca y contiene 21 preguntas que representan dimensiones físicas y emocionales. El sujeto completará el MLHFQ el día 1 del estudio y en los meses 3 y 6. Para minimizar las incoherencias en la conducta de prueba, el MLHFQ se administrará al comienzo de cada visita de estudio. Los sujetos deben completar el cuestionario en una sala silenciosa y deben responder a cada pregunta sin interrupciones e independientemente de otras influencias externas (ej., cónyuge, personal del sitio, investigador). Si el sujeto no puede leer, un personal del sitio debidamente capacitado debe administrar el cuestionario verbalmente sin sesgo y registrar con precisión todas las respuestas del sujeto y documentar el método de entrega. No habrá límite de tiempo para completarlo. El análisis se basará en el puntaje total de MLHFQ (cambio desde la línea base).

#### **DetECCIÓN DE TUBERCULOSIS**

Quantiferon-TB Gold es un análisis de sangre que ayuda a detectar *Mycobacterium tuberculosis*, la bacteria que causa la tuberculosis. QFT es un ensayo de liberación de interferón gamma. Esta es una prueba de laboratorio controlada que requiere solo una visita al paciente y no se ve afectada por la vacuna previa de Bacille Calmette-Guerin (BCG). Se incubaron alícuotas de sangre heparinizada completa con los antígenos de prueba durante 16-24 horas. La sangre debe incubarse con los antígenos de prueba <12 horas después de la recolección. Los kits de prueba incluyen dos mezclas de péptidos sintéticos que representan ESAT-6 y CFP-10 como antígenos de prueba, fitohemaglutinina (un mitógeno utilizado como control de ensayo positivo) y solución salina (utilizada como muestra nula para medir el nivel de fondo de IFN-g). Después de la incubación, la concentración de IFN-g en el

plasma se determina mediante ELISA usando los reactivos incluidos en el kit de prueba. La cantidad de IFN-g liberado se determina restando la cantidad en cero de la cantidad en el ESAT-6, CFP-10 o plasma estimulado por mitógeno. Los resultados de las pruebas QFT-G se pueden calcular utilizando el software proporcionado por el fabricante. Los informes de laboratorio deben incluir la interpretación de los resultados de la prueba QFT-G e indicar la concentración de IFN-g en cada muestra de plasma. Se considerará una prueba positiva con > 0.35IU / mL y > 50% por encima de cero.

### Equipo necesario

1. Equipo necesario para infusión intravenosa (guantes, agujas, jeringas, solución salina, sistemas de infusión)
2. Medicamento intravenoso:
  - Antihistamínico - Clorefeniramina, Difenhidramina
  - O Hidrocortisona
  - o Paracetamol
3. Máscara de oxígeno tipo Venturi, humidificador (Kendall)
4. ECG estándar de 12 derivaciones

### Apéndice 3

| Infusión  | Tasa de infusión                                                                                                                                                                                                                         |
|-----------|------------------------------------------------------------------------------------------------------------------------------------------------------------------------------------------------------------------------------------------|
| Primera   | <ul style="list-style-type: none"> <li>● Iniciar infusión a 50 mg/ hr</li> <li>● En ausencia de toxicidad por la infusión, escalar con incremento de 50mg/hr cada 30 minutos</li> <li>● Tasa de infusión máxima de 400mg/hr</li> </ul>   |
| Posterior | <ul style="list-style-type: none"> <li>● Iniciar infusión a 100 mg/hr</li> <li>● En ausencia de toxicidad por la infusión, escalar con incremento de 100mg/hr cada 30 minutos.</li> <li>● Tasa de infusión máxima de 400mg/hr</li> </ul> |

### Apéndice 4

#### Métodos anticonceptivos

Los métodos anticonceptivos se pueden dividir aproximadamente en cinco tipos: hormonal, barrera, dispositivo intrauterino, métodos de emergencia y métodos naturales. Los métodos aprobados en este protocolo son:

1. Métodos hormonales
  - Hormonas combinadas (píldora, parche)
  - Sólo progestina
2. Métodos de barrera (químicos y físicos)
  - Condones (condón masculino, condón femenino) + diafragma
  - Capuchón cervical
  - Esterilización (vasectomía, ligadura de trompas)
3. Dispositivo intrauterino (DIU)
4. Método natural
5. Abstinencia

## Apéndice 5

### VARIABLES

| VARIABLE                                       | DEFINICIÓN CONCEPTUAL                                                                                                                                                      | DEFINICIÓN OPERACIONAL                                                                        | TIPO DE VARIABLE         | ESCALA DE MEDICIÓN                                         | VALOR DE VARIABLE                                |
|------------------------------------------------|----------------------------------------------------------------------------------------------------------------------------------------------------------------------------|-----------------------------------------------------------------------------------------------|--------------------------|------------------------------------------------------------|--------------------------------------------------|
| <b>Edad</b>                                    | Años de vida del paciente                                                                                                                                                  | Número de años de vida cumplidos a la fecha de inclusión                                      | Cuantitativa<br>Continua | 18-45<br>46-65<br><input type="checkbox"/> 65              | 18-110                                           |
| <b>Género</b>                                  | Género del paciente                                                                                                                                                        | Masculino o Femenino                                                                          | Cualitativa Dicotómica   | Nominal                                                    | M, F                                             |
| <b>Peso</b>                                    | Peso del paciente                                                                                                                                                          | Kilogramos                                                                                    | Cuantitativa<br>Continua | Numérica en Kg                                             | 0-200                                            |
| <b>Índice de Masa Corporal</b>                 | Es la estimación de la masa corporal del paciente estandarizada para su estatura, sirve para determinar el sobrepeso u obesidad                                            | Es el producto del peso del paciente en Kilogramos entre el cuadrado de su estatura en metros | Cualitativa en Intervalo | Normal 18-25<br>Sobrepeso 26-27<br>Obesidad mayor de 27    | Numérica en Kg/m <sup>2</sup>                    |
| <b>Diabetes Mellitus</b>                       | Conjunto de trastornos metabólicos cuya característica común principal es la presencia de concentraciones elevadas de glucosa en la sangre de manera persistente o crónica | Según refiera el paciente al realizar la historia clínica                                     | Cualitativa Dicotómica   | Si<br>No                                                   | Positivo o Negativo                              |
| <b>Hipertensión Arterial</b>                   | Enfermedad crónica caracterizada por un incremento continuo de las cifras de presión arterial por encima de los límites sobre los cuales aumenta el riesgo cardiovascular  | Según refiera el paciente al realizar la historia clínica                                     | Cualitativa Dicotómica   | Si<br>No                                                   | Positivo<br>Negativo                             |
| <b>Enfermedad Pulmonar Obstructiva Crónica</b> | Conjunto de enfermedades pulmonares crónicas que reducen el flujo de aire                                                                                                  | Según refiera el paciente al realizar la historia clínica                                     | Cualitativa Dicotómica   | Si<br>No                                                   | Positivo<br>Negativo                             |
| <b>Enfermedad Renal Crónica</b>                | Daño renal por más de 3 meses, definido como una depuración de                                                                                                             | Según refiera el paciente al realizar la historia clínica, además                             | Cualitativa Intervalo    | Estadio 1: DC <input type="checkbox"/><br>90 mg / mL / min | Estadio 1<br>Estadio 2<br>Estadio 3<br>Estadio 4 |



|                                                                                                  |                                                                                                                                                                                              |                                                                                                                            |                    |                                                                                                                                                                                                                                                     |                                              |
|--------------------------------------------------------------------------------------------------|----------------------------------------------------------------------------------------------------------------------------------------------------------------------------------------------|----------------------------------------------------------------------------------------------------------------------------|--------------------|-----------------------------------------------------------------------------------------------------------------------------------------------------------------------------------------------------------------------------------------------------|----------------------------------------------|
|                                                                                                  | creatinina estimado < 60 mg / mL / min o estar recibiendo terapia de sustitución renal                                                                                                       | del cálculo de la depuración de creatinina según la fórmula de Cockcroft-Gault                                             |                    | Estadio 2: DC 60-89 mg / mL / min<br>Estadio 3: DC 30-59 mg / mL / min<br>Estadio 4: DC 15-29 mg / mL / min<br>Estadio 5: DC < 15 mg / mL / min                                                                                                     | Estadio 5                                    |
| <b>Clase funcional NYHA</b>                                                                      | Grado de tolerancia a la actividad física con o sin síntomas de falla cardíaca en reposo según la NYHA                                                                                       | Se establecerá según los síntomas referidos por el paciente de manera inicial y durante las visitas                        | Cualitativa Escala | Clase I: la actividad física habitual no causa síntomas<br>Clase II: la actividad física habitual causa síntomas, pero no en reposo<br>Clase III: limitación importante de la actividad física menor de la habitual<br>Clase IV: Síntomas en reposo | Clase I<br>Clase II<br>Clase III<br>Clase IV |
| <b>Caminata de 6 minutos</b>                                                                     | Es un marcador que evalúa de forma integrada la respuesta de los sistemas respiratorio, cardiovascular, metabólico, músculo esquelético y neurosensorial al estrés impuesto por el ejercicio | Es la cantidad en metros que un paciente puede recorrer en 6 minutos caminando lo más rápido que le sea posible            | Cuantitativa       | Sin variación: variación menor de 30m entre pruebas<br>Variación significativa: Variación mayor a 30m entre pruebas                                                                                                                                 | Mayor de 350m<br>Menor de 350m               |
| <b>Puntaje de Cuestionario de Minnesota para pacientes con falla cardíaca (versión española)</b> | Es un instrumento de evaluación de calidad de vida que consta de 21 reactivos en las dimensiones física y emocional                                                                          | El puntaje máximo obtenido en la evaluación inicial y en cada visita, tanto la sumatoria total como en las dos dimensiones | Cuantitativa       | <i>Puntaje inicial</i><br><i>Variación significativa:</i><br>Variación mayor de 10 puntos<br><i>Sin variación:</i><br>variación menor de 10 puntos entre visitas                                                                                    | 0-120                                        |
| <b>Grosor del septum miocárdico</b>                                                              | Es un marcador de aumento de la presión intramiocárdica de forma crónica                                                                                                                     | Es la cantidad de centímetros entre el borde endocárdico izquierdo septal y el borde derecho del mismo                     | Cuantitativa       | Grosor en centímetros                                                                                                                                                                                                                               | Cm                                           |

|                                                       |                                                                                                                  |                                                                                                                                                                                                                                                                                                      |               |            |                                                |
|-------------------------------------------------------|------------------------------------------------------------------------------------------------------------------|------------------------------------------------------------------------------------------------------------------------------------------------------------------------------------------------------------------------------------------------------------------------------------------------------|---------------|------------|------------------------------------------------|
|                                                       |                                                                                                                  | evaluados por ecocardiografía                                                                                                                                                                                                                                                                        |               |            |                                                |
| <b>Fracción de expulsión del ventrículo izquierdo</b> | Es un marcador de contractilidad miocárdico                                                                      | Es la proporción de volumen expulsado en un latido del ventrículo izquierdo en porcentaje                                                                                                                                                                                                            | Cuantitativa  | Porcentaje | Porcentaje                                     |
| <b>Evento Adverso Mayor</b>                           | Es la presencia de una alteración sintomática o signológica que representa un deterioro de la salud del paciente | Presencia de cualquiera de las siguientes mientras el paciente : Angina inestable, infarto agudo al miocardio, estertores nuevos, implantación de un dispositivo de asistencia ventricular, trasplante cardiaco, arritmia ventricular sostenida, muerte de origen cardiaco, paro cardiorrespiratorio | Cualitativa   | Si No      | Positivo Negativo                              |
| <b>Infusión sin eventos adversos</b>                  | Sujetos que recibieron la infusión completa sin efectos adversos                                                 | Número de sujetos que recibieron las 2 infusiones sin presentar eventos adversos                                                                                                                                                                                                                     | Cuantitativa  | Numérica   | 0-10                                           |
| <b>Infusión con eventos adversos</b>                  | Sujetos que recibieron la infusión completa pero presentaron eventos adversos                                    | Sujetos que recibieron la infusión completa pero presentaron eventos adversos                                                                                                                                                                                                                        | Cuantitativa  | Numérica   | 0-10                                           |
| <b>No infusión</b>                                    | Sujetos que no terminaron la infusión por cualquier motivo que no sea MACE                                       | Número de sujetos que no recibieron la infusión por cualquier motivo que no sean EA ya descritos                                                                                                                                                                                                     | Cuantitativa  | Numérica   | 0-10                                           |
| <b>Concentración de biomarcadores</b>                 | Indicadores de disfunción miocárdica, aumento de presión intracardiaca o daño miocárdico                         | Se registrarán las concentraciones de todos los biomarcadores descritos anteriormente de manera individual y sus variaciones entre visitas                                                                                                                                                           | Cuantitativas | Numérica   | Variable dependiendo del rango del laboratorio |

## Apéndice 6

Forma de consentimiento informado, se presenta en impresión por separado

## Referencias

1. Savarese G, Division of Cardiology, Department of Medicine, Karolinska Institutet, Stockholm, Sweden, Department of Cardiology, Karolinska University Hospital, Stockholm, Sweden, et al. Global Public Health Burden of Heart Failure. *Card Fail Rev* 2017; 03: 7.
2. Vinson JM, Rich MW, Sperry JC, et al. Early Readmission of Elderly Patients With Congestive Heart Failure. *J Am Geriatr Soc* 1990; 38: 1290–1295.
3. Lipicky RJ, Packer M. Role of surrogate end points in the evaluation of drugs for heart failure. *J Am Coll Cardiol* 1993; 22: A179–A184.
4. Verma A, Kalman JM, Callans DJ. Treatment of Patients With Atrial Fibrillation and Heart Failure With Reduced Ejection Fraction. *Circulation* 2017; 135: 1547–1563.
5. Greenberg B, Quinones MA, Koilpillai C, et al. Effects of Long-term Enalapril Therapy on Cardiac Structure and Function in Patients With Left Ventricular Dysfunction: Results of the SOLVD Echocardiography Substudy. *Circulation* 1995; 91: 2573–2581.
6. Sánchez-Trujillo L, Vázquez-Garza E, Castillo EC, et al. Role of Adaptive Immunity in the Development and Progression of Heart Failure: New Evidence. *Arch Med Res* 2017; 48: 1–11.
7. Torre-Amione G, Kapadia S, Lee J, et al. Tumor Necrosis Factor- $\alpha$  and Tumor Necrosis Factor Receptors in the Failing Human Heart. *Circulation* 1996; 93: 704–711.
8. Feiner EC, Chung P, Jasmin JF, et al. Left Ventricular Dysfunction in Murine Models of Heart Failure and in Failing Human Heart is Associated With a Selective Decrease in the Expression of Caveolin-3. *J Card Fail* 2011; 17: 253–263.
9. Flores-Arredondo JH, García-Rivas G, Torre-Amione G. Immune Modulation in Heart Failure: Past Challenges and Future Hopes. *Curr Heart Fail Rep* 2011; 8: 28–37.
10. Kaya Z, Leib C, Katus HA. Autoantibodies in Heart Failure and Cardiac Dysfunction. *Circ Res* 2012; 110: 145–158.
11. Youker KA, Assad-Kottner C, Cordero-Reyes AM, et al. High proportion of patients with end-stage heart failure regardless of aetiology demonstrates anti-cardiac antibody deposition in failing myocardium: humoral activation, a potential contributor of disease progression. *Eur Heart J* 2014; 35: 1061–1068.
12. Ludwig RJ, Vanhoorelbeke K, Leyboldt F, et al. Mechanisms of Autoantibody-Induced Pathology. *Front Immunol*; 8. Epub ahead of print 2017. DOI: 10.3389/fimmu.2017.00603.
13. Epelman S, Liu PP, Mann DL. Role of innate and adaptive immune mechanisms in cardiac injury and repair. *Nat Rev Immunol* 2015; 15: 117–129.
14. Cordero-Reyes AM, Youker KA, Trevino AR, et al. Full Expression of Cardiomyopathy Is Partly Dependent on B-Cells: A Pathway That Involves Cytokine Activation, Immunoglobulin Deposition, and Activation of Apoptosis. *J Am Heart Assoc* 2016; 5: e002484.
15. Imamura T, Kinugawa K, Kato N, et al. Successful Treatment of Hemodynamic Compromise Caused by Antibody-Mediated and Cellular Rejection in a Recipient 12 years After Heart Transplantation. *Int Heart J* 2013; 54: 328–331.
16. Ravichandran AK, Schilling JD, Novak E, et al. Rituximab is associated with improved survival in cardiac allograft patients with antibody-mediated rejection: a single center review. *Clin Transplant* 2013; 27: 961–967.
17. Toscano G, Tartaro P, Fedrigo M, et al. Rituximab in recurrent idiopathic giant cell myocarditis after heart transplantation: a potential therapeutic approach. *Transpl Int* 2014; 27: e38–e42.
18. Asante-Korang A, Jacobs JP, Ringewald J, et al. Management of children undergoing cardiac transplantation with high Panel Reactive Antibodies. *Cardiol Young* 2011; 21: 124–132.

19. Patel JK, Kobashigawa JA. Improving survival during heart transplantation: diagnosis of antibody-mediated rejection and techniques for the prevention of graft injury. *Future Cardiol* 2012; 8: 623–635.
20. Ridker PM, Everett BM, Thuren T, et al. Antiinflammatory Therapy with Canakinumab for Atherosclerotic Disease. *N Engl J Med* 2017; 377: 1119–1131.
21. Rubbert-Roth A, Tak PP, Zerbini C, et al. Efficacy and safety of various repeat treatment dosing regimens of rituximab in patients with active rheumatoid arthritis: results of a Phase III randomized study (MIRROR). *Rheumatology* 2010; 49: 1683–1693.
22. Kasi PM, Tawbi HA, Oddis CV, et al. Clinical review: Serious adverse events associated with the use of rituximab - a critical care perspective. *Crit Care* 2012; 16: 231.
23. Specks U, Merkel PA, Seo P, et al. Efficacy of Remission-Induction Regimens for ANCA-Associated Vasculitis. *N Engl J Med* 2013; 369: 417–427.(supplementary material)
24. Zhang Y, Vermeulen LC, Kolesar JM. Stability of Stock and Diluted Rituximab. *Am J Health-Syst Pharm AJHP Off J Am Soc Health-Syst Pharm* 2013; 70: 436–438.
25. Mohrbacher A. B cell non-Hodgkin's lymphoma: rituximab safety experience. *Arthritis Res Ther* 2005; 7: S19–S25.
26. Omri HE, Taha RY, Gamil A, et al. Efficacy and Safety of Rituximab for Refractory and Relapsing Thrombotic Thrombocytopenic Purpura: A Cohort of 10 Cases. *Clin Med Insights Blood Disord* 2015; 8: CMBD.S25326.
27. Dotan E, Aggarwal C, Smith MR. Impact of Rituximab (Rituxan) on the Treatment of B-Cell Non-Hodgkin's Lymphoma. *Pharm Ther* 2010; 35: 148–157.
28. Aronson JK. *Meyler's side effects of cardiovascular drugs*. 1st ed. Amsterdam; Boston, Mass.: Elsevier, <http://www.clinicalkey.com/dura/browse/bookChapter/3-s2.0-C20090017875> (2009, accessed 10 November 2017).
29. Ng KH, Dearden C, Gruber P. Rituximab-induced Takotsubo syndrome: more cardiotoxic than it appears? *BMJ Case Rep* 2015; 2015: bcr2014208203.
30. Agca R, Heslinga SC, Rollefstad S, et al. EULAR recommendations for cardiovascular disease risk management in patients with rheumatoid arthritis and other forms of inflammatory joint disorders: 2015/2016 update. *Ann Rheum Dis*. Epub ahead of print 3 October 2016. DOI: 10.1136/annrheumdis-2016-209775.
31. Cheungpasitporn W, Kopecky SL, Specks U, et al. Non-ischemic cardiomyopathy after rituximab treatment for membranous nephropathy. *J Ren Inj Prev* 2017; 6: 18–25.
32. Genetech, Inc. HIGHLIGHTS OF PRESCRIBING INFORMATION, [https://www.gene.com/download/pdf/rituxan\\_prescribing.pdf](https://www.gene.com/download/pdf/rituxan_prescribing.pdf) (2016).
